# Supplementary material for: Nutrition and Immunity in Perinatal Hypoxic-Ischemic Injury
Source: MDPI journal article supplement (doi:10.3390/nu14132747), 2022-07-01
Supplement: s1 [file s1]

## Supplementary Material

**Title: Nutrition and immunity in perinatal hypoxic-ischemic injury.**

**Authors: Gandecha Hema, Kaur Avineet, Sanghera Ranveer, Preece Joanna and Pillay Thillagavathie**

Search engines used : Medline, EMBASE and PubMed

Time Span : 2012 -2022

| Concepts explored                                                         | Search strategy: key words/phrases                                                                                                                                                                                                                                                                                                                                                                                                                                                                                                                                                                                                                                                      | Total number of English language articles / abstracts identified              |
|---------------------------------------------------------------------------|-----------------------------------------------------------------------------------------------------------------------------------------------------------------------------------------------------------------------------------------------------------------------------------------------------------------------------------------------------------------------------------------------------------------------------------------------------------------------------------------------------------------------------------------------------------------------------------------------------------------------------------------------------------------------------------------|-------------------------------------------------------------------------------|
| Interplay between macronutrients and micronutrients and immunity          | Nutrition AND immunity AND (micronutrient OR macronutrient)                                                                                                                                                                                                                                                                                                                                                                                                                                                                                                                                                                                                                             | 363                                                                           |
| Effect of hypoxia ischaemia on nutrition in relation to immunity          | (Hypoxia OR ischemia OR ischaemia OR hypoxic) AND (Immunity OR Immune) AND (Trace Element OR Micronutrient OR Macronutrient)                                                                                                                                                                                                                                                                                                                                                                                                                                                                                                                                                            | 84                                                                            |
| Interplay between macronutrients and micronutrients and neonatal immunity | Immunity AND (Neonate OR Newborn OR Fetus OR Foetus) AND one of the following:<br><ol style="list-style-type: none"> <li>1. Vitamin A</li> <li>2. Vitamin B (Thiamin / vitamin B1, riboflavin / vitamin B2, niacin / vitamin B3, pantothenic acid, vitamin B6, biotin / vitamin B7, folate / folic acid, vitamin B12).</li> <li>3. Vitamin C</li> <li>4. Vitamin D</li> <li>5. Vitamin E</li> <li>6. Folate</li> <li>7. Zinc</li> <li>8. Copper</li> <li>9. Iron</li> <li>10. Selenium</li> <li>11. Glucose</li> <li>12. Oligosaccharides</li> <li>13. Amino Acids</li> <li>14. Dietary nucleotides</li> <li>15. Glycoproteins</li> <li>16. Fatty acids OR Short chain fatty</li> </ol> | Individual searches conducted to complete Table 1 (See individual references) |

|                                                                              |                                                                                                                                                                                                                                                                                                                                                                                                                                                                                                           |     |
|------------------------------------------------------------------------------|-----------------------------------------------------------------------------------------------------------------------------------------------------------------------------------------------------------------------------------------------------------------------------------------------------------------------------------------------------------------------------------------------------------------------------------------------------------------------------------------------------------|-----|
|                                                                              | acids OR long chain polyunsaturated fatty acids                                                                                                                                                                                                                                                                                                                                                                                                                                                           |     |
| Therapeutic hypothermia and immunity                                         | Newborn AND Therapeutic Hypothermia AND Immunity<br>Newborn AND Cooling AND Immunity<br>Neonate AND Therapeutic Hypothermia AND Immunity<br>Neonate AND Cooling AND Immunity <ul style="list-style-type: none"> <li>• After removal of duplicates</li> </ul>                                                                                                                                                                                                                                              | 206 |
| Hypoxia ischemia, nutrition and immunity in neonates                         | Hypoxia AND Ischaemia AND (Newborn OR Neonate OR infant) AND <ol style="list-style-type: none"> <li>1. Brain injury</li> <li>2. Brain</li> <li>3. Mitochondria</li> <li>4. Metabolism</li> <li>5. Placenta</li> <li>6. Glucose</li> <li>7. Oxidative stress</li> <li>8. Antioxidants</li> <li>9. Free radicals</li> <li>10. Oxidative damage</li> <li>11. Ketones</li> <li>12. Electrolytes</li> <li>13. Iron</li> <li>14. Hypoglycaemia</li> <li>15. Hyperglycaemia</li> <li>16. Brain energy</li> </ol> | 24  |
| Interaction between nutrition and immunity and the microbiome in the newborn | Nutrition AND Immunity AND Microbiome AND (Neonate OR Newborn)                                                                                                                                                                                                                                                                                                                                                                                                                                            | 65  |
